# Supplementary material for: Biocompatible, multifunctional, and well-defined OEG-based dendritic platforms for biomedical applications
Source: Royal Society of Chemistry journal article supplement (doi:10.1039/c3ob40492g), 2013-01-01
Supplement: c3ob40492g.pdf [file c3ob40492g.pdf]

## Supporting Information

# Biocompatible, multifunctional, and well-defined OEG-based dendritic platforms for biomedical applications

*Lorena Simón-Gracia<sup>a</sup>, Daniel Pulido<sup>b,c</sup>, Chantal Sevrin<sup>d</sup>, Christian Grandfils<sup>d</sup>, Fernando Albericio<sup>\*a,b,e</sup>, and Miriam Royo<sup>\*b,c</sup>*

<sup>a</sup>Institute for Research in Biomedicine, <sup>b</sup>CIBER-BBN, Networking Center on Bioengineering, Biomaterials and Nanomedicine, and <sup>c</sup>Combinatorial Chemistry Unit, Barcelona Science Park, Baldiri Reixac 10, 08028 Barcelona, Spain; <sup>d</sup>Interfaculty Research Centre of Biomaterials. University of Liège. Institute of Chemistry. Building B6C. Sart-Tillman (Liège), Belgium; <sup>e</sup>Department of Organic Chemistry, University of Barcelona, Martí i Franqués 1-11, 08028 Barcelona, Spain.

|                                                                         |     |
|-------------------------------------------------------------------------|-----|
| Dendrons' purification and characterization                             | S2  |
| Dynamic Light Scattering and $\zeta$ -Potential                         | S3  |
| RBC's morphology                                                        | S4  |
| Counting and size distribution of RBC, platelets and white blood cells  | S5  |
| HPLC-MS, MALDI-TOF spectrometry and NMR spectrometry of tested dendrons | S6  |
| -Dendron <b>7</b> ( <b>G1-NH2-Bn</b> )                                  | S6  |
| -Dendron <b>8</b> ( <b>G1-Ac-Bn</b> )                                   | S8  |
| -Dendron <b>13</b> ( <b>G2-NH2-Bn</b> )                                 | S11 |
| -Dendron <b>14</b> ( <b>G2-Ac-Bn</b> )                                  | S14 |

## 1. Dendrons' purification and characterization

Flash chromatography was done using silica gel 60 (35-70  $\mu\text{m}$ ) from SDS or basic aluminium oxide (pH 10) from Sigma Aldrich. TLC was performed on Merck 60F<sub>254</sub> silica foils or on Fluka aluminium oxide foils and visualized by potassium permanganate stains. Semi-preparative HPLC was carried out on a Waters chromatography system (2767 Sample Manager) with a 2489 UV/visible detector and ZQ 4000 mass detector. A reverse phase XBridge C<sub>18</sub> column (5  $\mu\text{m}$ , 19x100 mm) from Waters and linear gradients of CH<sub>3</sub>CN into NH<sub>4</sub>HCO<sub>3</sub> 20 mM were used. The system was run at a flow rate of 16 mL/min over 5 min. For salts elimination, the samples were purified using reverse phase column (PoraPak Rxn from Waters) using a solution of 20% of CH<sub>3</sub>CN in water as eluent. Analytical HPLC was performed using a Waters chromatography system (2695 Separation Module) with a 2998 photodiode array detector. The samples were run using a reverse phase XBridge BEH130 C<sub>18</sub> column (3.5  $\mu\text{m}$ , 4.6x100 mm) from Waters and linear gradients of CH<sub>3</sub>CN with 0.036% trifluoroacetic acid (TFA) into H<sub>2</sub>O with 0.045 % of TFA. The flow rate used was 1 mL/min over 8 min. HPLC-MS was performed using a Waters instrument (2795 Separations Module) with a 2996 photodiode array detector and ZQ 4000 mass detector; a reverse phase XBridge C<sub>18</sub> column (3.5  $\mu\text{m}$ , 4.6x50 mm) from Waters and linear gradients of CH<sub>3</sub>CN with 0.07% formic acid into H<sub>2</sub>O with 0.1% of formic acid. The system was run at a flow rate of 2 mL/min over 4.5 min. For electrospray high resolution mass spectrometry (HRMS), the samples were dissolved in CH<sub>3</sub>CN: H<sub>2</sub>O (1:10), introduced in an Automated Nano electrospray (NanoMate, Advion BioSciences, Ithaca, NY, USA) and infused through LTQ-FT ultra mass spectrometer (Thermo Scientific). Mass spectra were also recorded on a MALDI Voyager DE RP time-of-flight (TOF) spectrometer (Applied Biosystems, Foster City, CA, USA) using  $\alpha$ -cyano-4-hydroxycinnamic acid matrix (ACH, from Sigma Aldrich) and sinapinic acid matrix (from Fluka). <sup>1</sup>H NMR and <sup>13</sup>C NMR spectra were recorded on a Varian Mercury 400 MHz spectrometer and a Varian Inova 500 MHz spectrometer. Multiplicity of the carbons was assigned with gHSQC experiments. Standard abbreviations according to off-resonance decoupling are used: (s) singlet, (d) doublet, (t) triplet, (q) quartet, (m) multiplet, (bs) broad signal. The <sup>13</sup>C data is reported as the ppm on the  $\delta$  scale.

Chemical shifts are reported in ppm and referenced to appropriate residual solvent peaks: proton ( $\text{CDCl}_3$  7.26 ppm,  $\text{D}_2\text{O}$  4.70) and carbon ( $\text{CDCl}_3$  77.0 ppm).

## 2. Dynamic Light Scattering and $\zeta$ -Potential

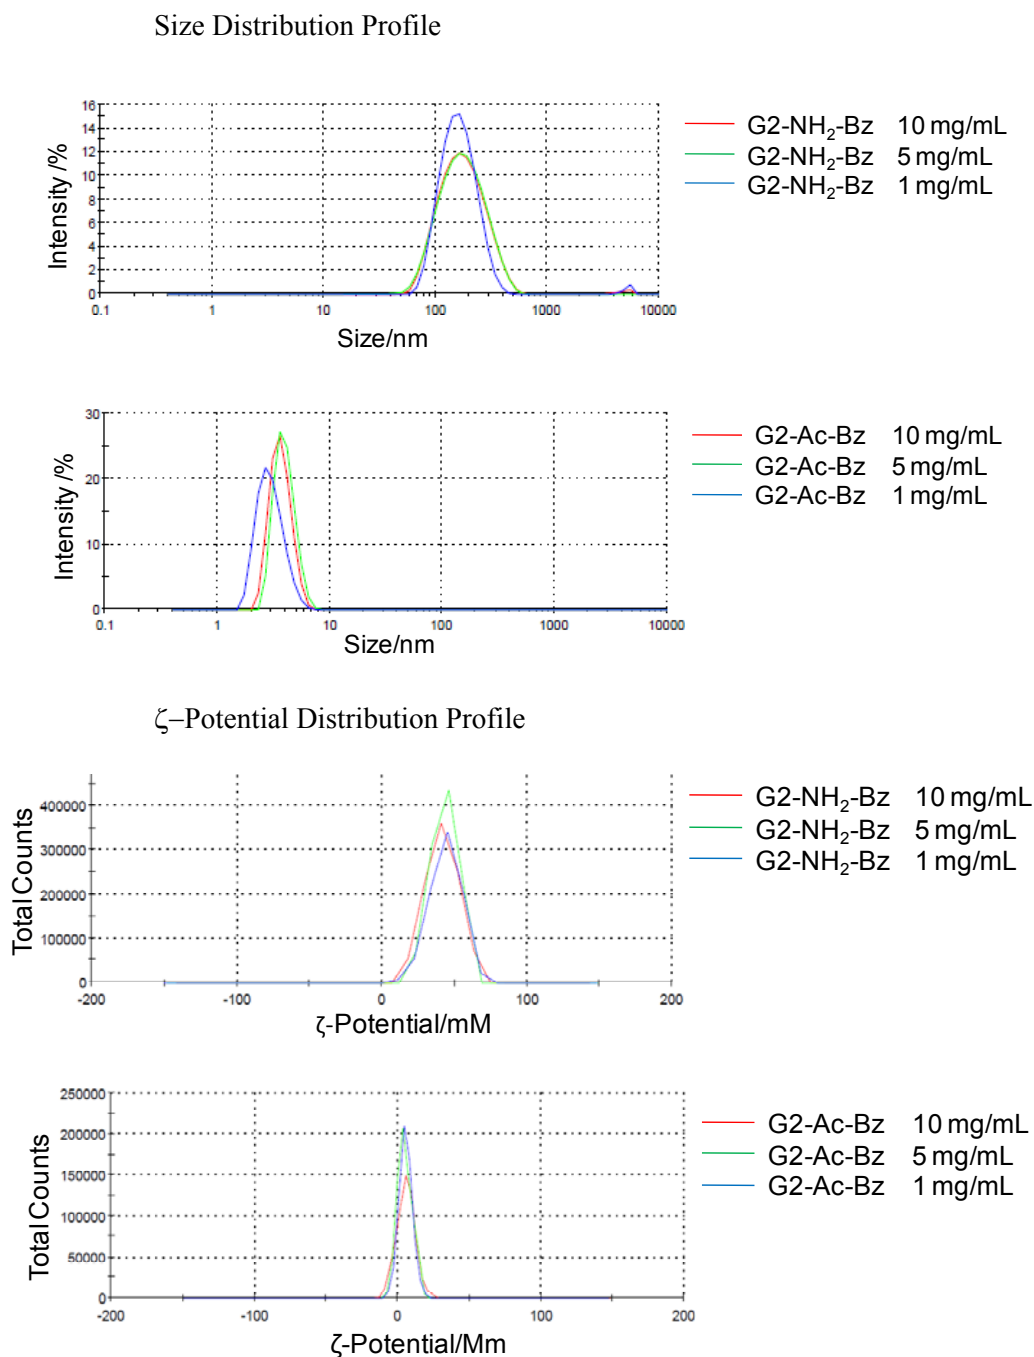

**Figure 1.** Size distribution profiles by intensity and  $\zeta$ -Potential distribution profiles of the second generation dendrons at room temperature in PBS (0.01 M phosphate buffer, 0.154 M NaCl) measured by DLS.

### 3. RBC's morphology

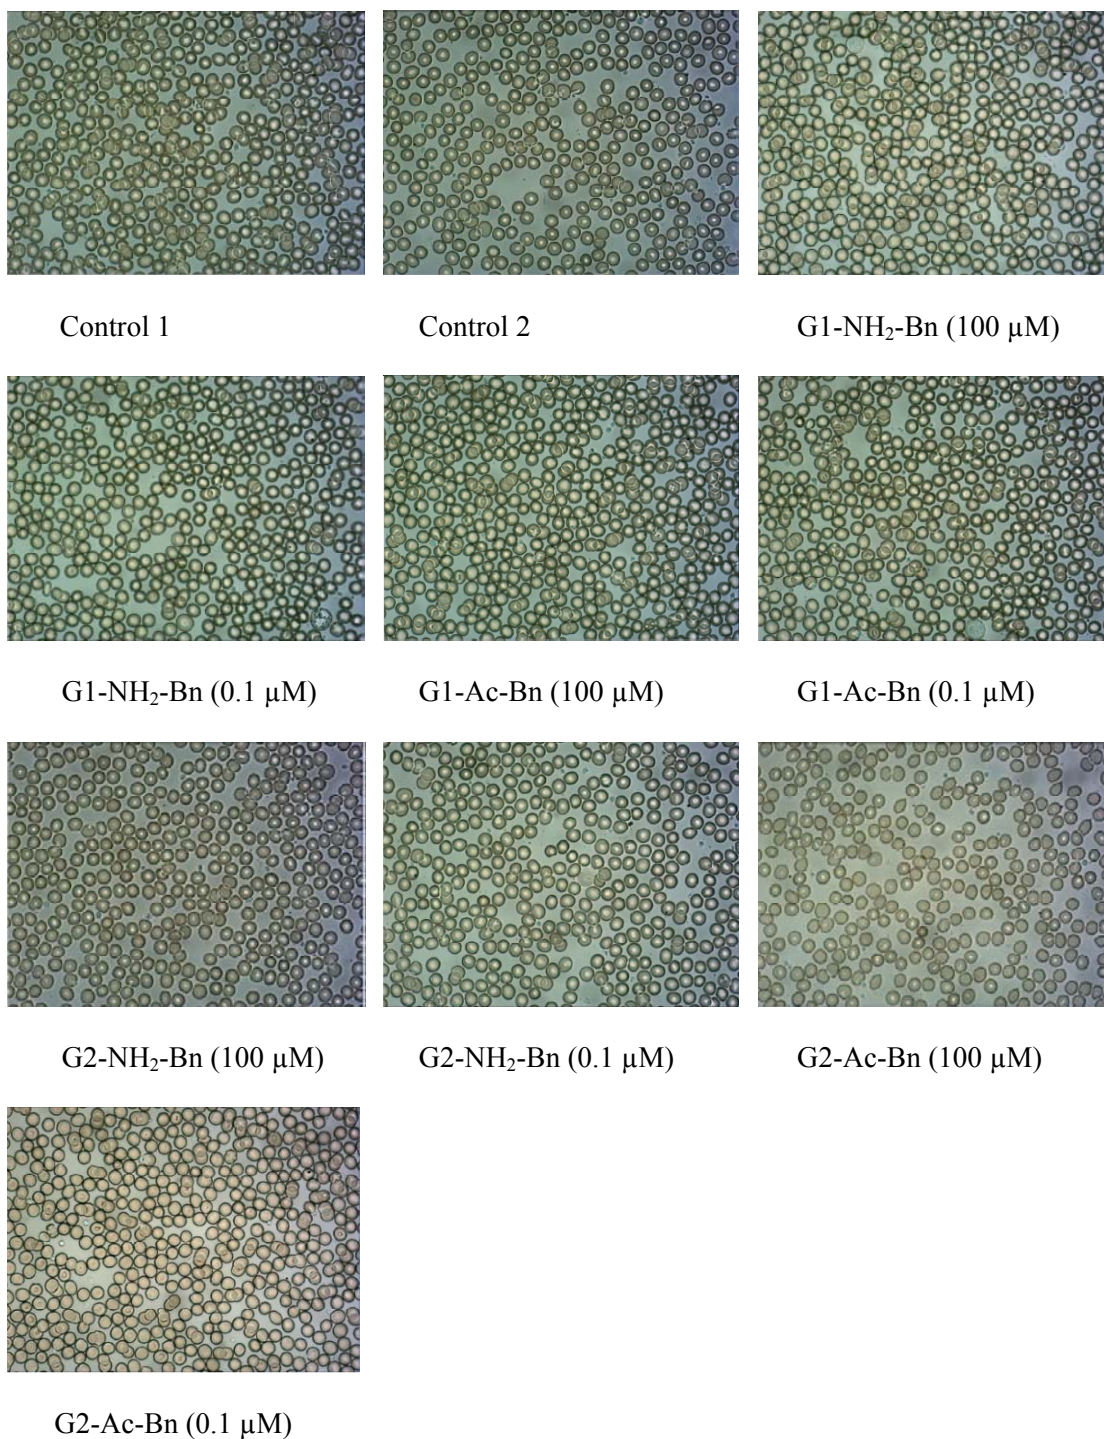

**Figure 2.** Micrographs of blood smear after incubation at 37 °C with the different dendrons during 15 min. The pictures were taken at 50x using an inverse phase microscopy Olympus Provis equipped with a digital camera VisiCam of 5 mega pixels (VWR International). Control 1: blood not exposed to dendrons and not incubated. Control 2: blood incubated but not exposed to dendrons.

#### 4. Counting and size distribution of RBC, platelets and white blood cells

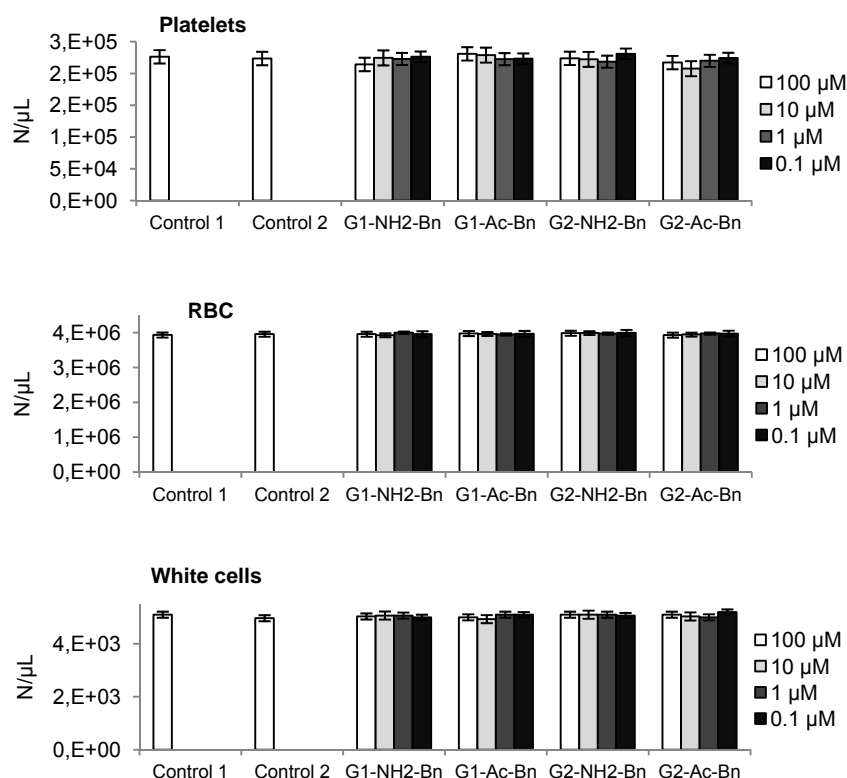

**Figure 3.** Counting of platelets, RBCs and white blood cells after incubation at 37 °C of the different dendrons during 15 min. Results are expressed in number of cells per  $\mu\text{L}$  of blood. Control 1: blood not exposed to dendrons and not incubated. Control 2: blood incubated but not exposed to dendrons.

## 5. HPLC, MALDI-TOF spectrometry and NMR spectrometry of the tested dendrons

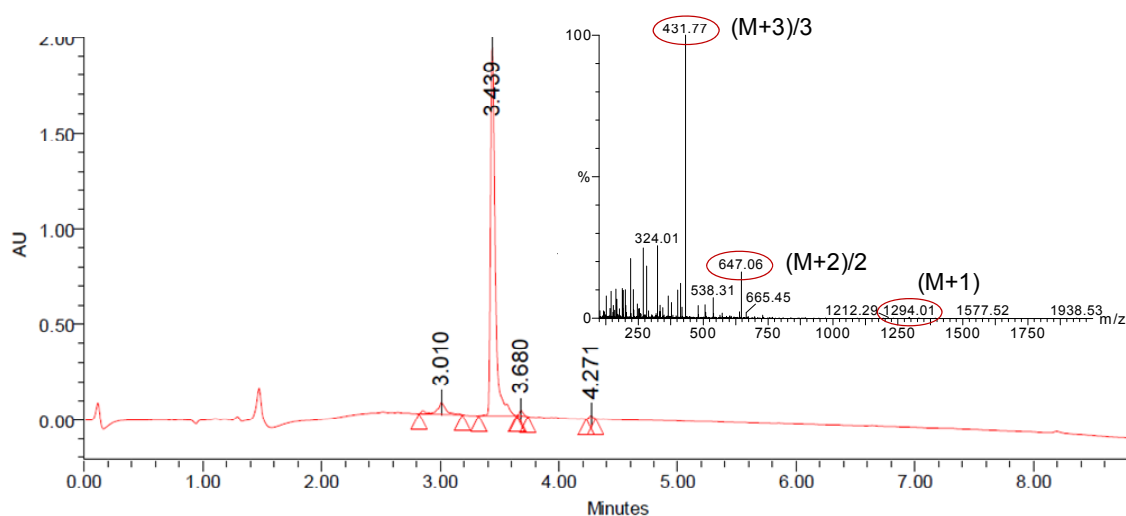

**Figure 4.** HPLC-MS profile of dendron **7** (G1-NH<sub>2</sub>-Bn). Analytical HPLC: 5→100% of CH<sub>3</sub>CN in H<sub>2</sub>O over 8 min,  $t_R$ =3.44 min (92% at  $\lambda$ =210 nm).

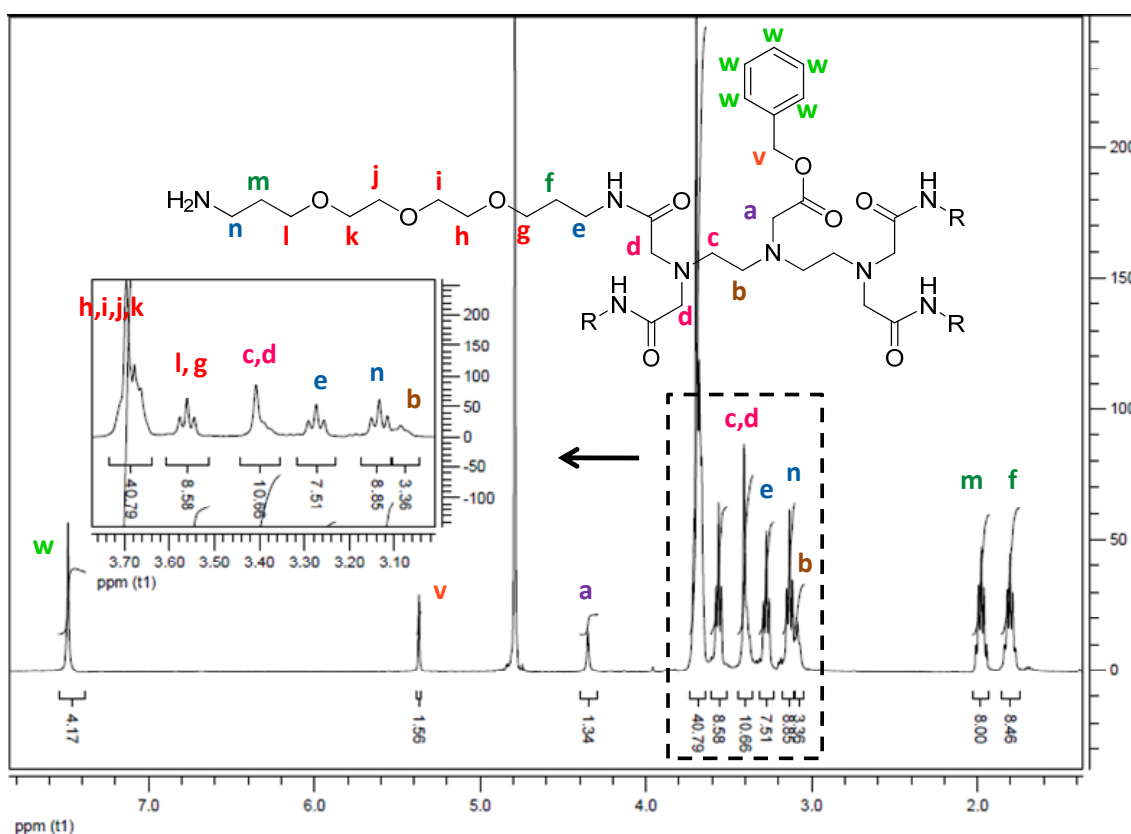

**Figure 5.** <sup>1</sup>H NMR spectrometry of first generation dendron **7** (G1-NH<sub>2</sub>-Bn).

**R** represents: CCCCOCCOCCOCCN

The signals assignment is equivalent for all branches.



**$^1\text{H}$  NMR** (400 MHz,  $\text{D}_2\text{O}$ , 25 °C):  $\delta$ =1.80 (m, 8 H), 1.98 (m, 8 H), 3.09 (m, 4 H), 3.13 (t,  $^3J(\text{H,H})$ =7.07 Hz, 8 H), 3.27 (t,  $^3J(\text{H,H})$ =6.90 Hz, 8 H), 3.41 (m, 12 H), 3.56 (t,  $^3J(\text{H,H})$ =6.41 Hz, 8 H), 3.69 (m, 40 H), 4.35 (s, 2 H), 5.37 (s, 2 H), and 7.49 (m, 5 H).

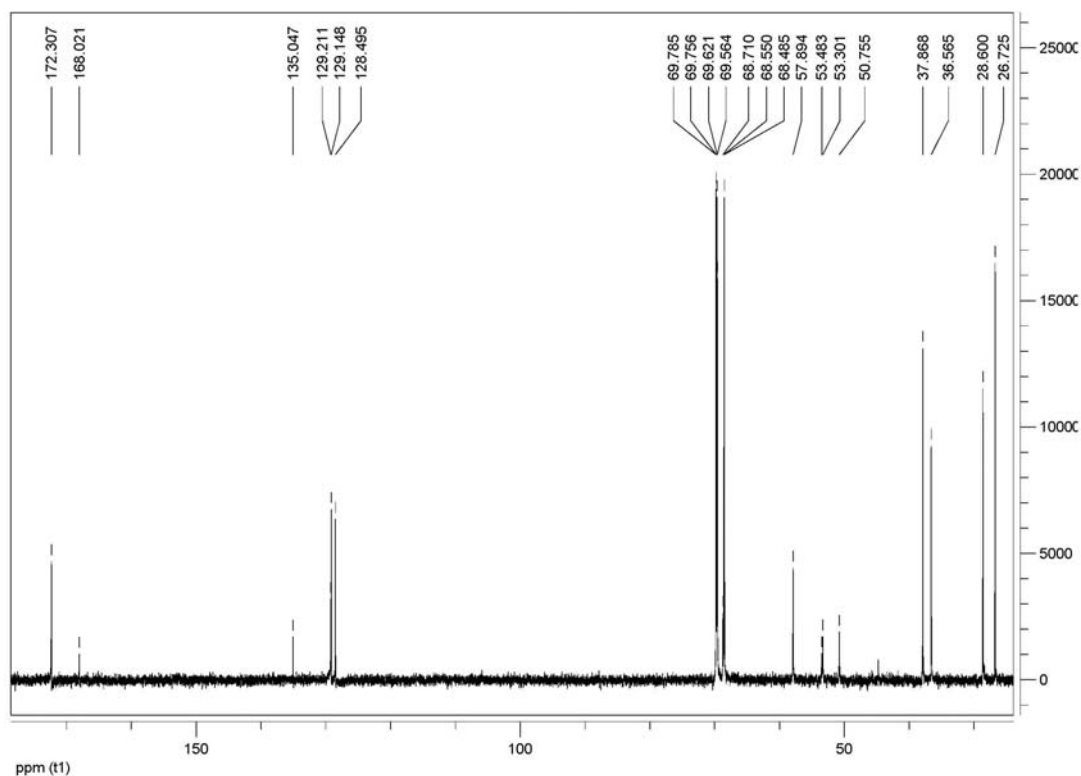

**Figure 6.**  $^{13}\text{C}$  NMR spectrometry of first generation dendron **7** ( $\text{G1-NH}_2\text{-Bn}$ ).

**$^{13}\text{C}$  NMR** (100 MHz,  $\text{CDCl}_3$ , 25 °C):  $\delta$ = 26.73, 28.60, 36.57, 37.87, 50.76, 53.30, 53.48, 57.89, 68.49, 68.55, 68.71, 69.56, 69.62, 69.76, 69.79, 128.49, 129.14, 129.21, 135.05, 168.02, and 172.31.

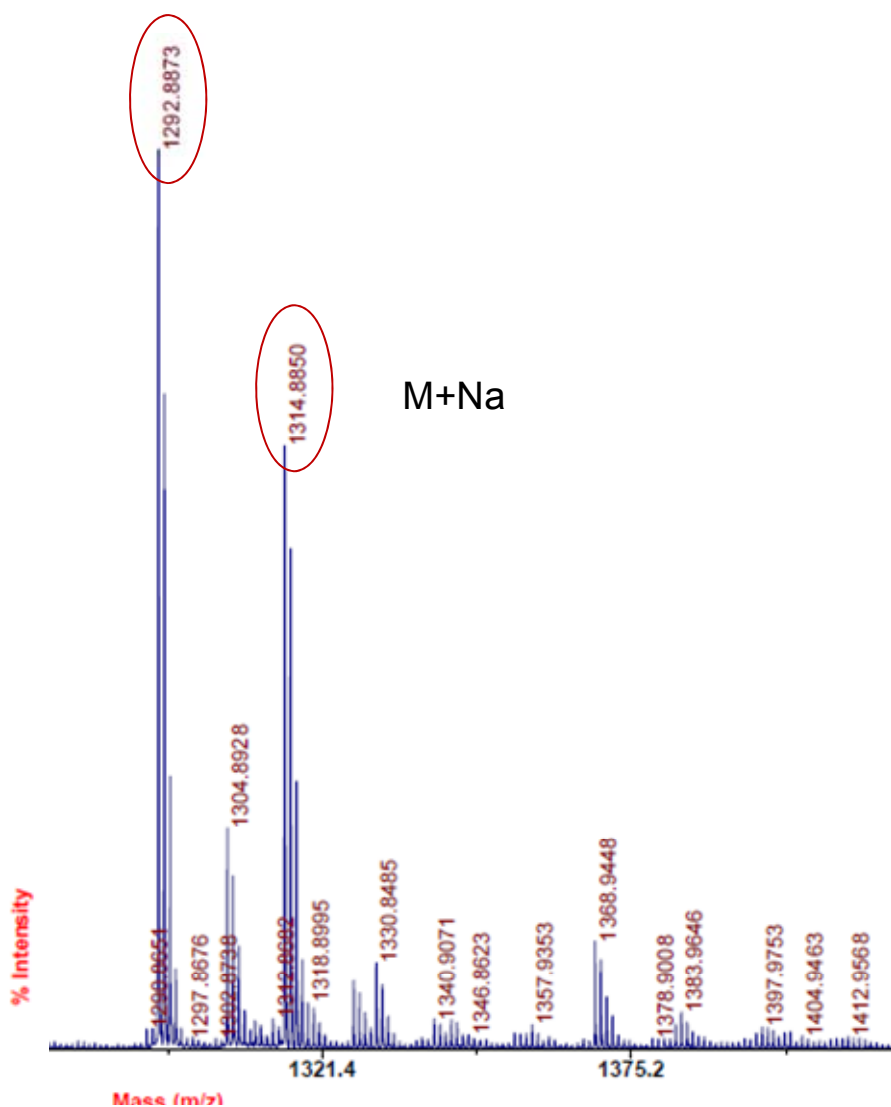

**Figure 7.** MALDI-TOF spectrometry of first generation dendron **7** (G1-NH<sub>2</sub>-Bn).

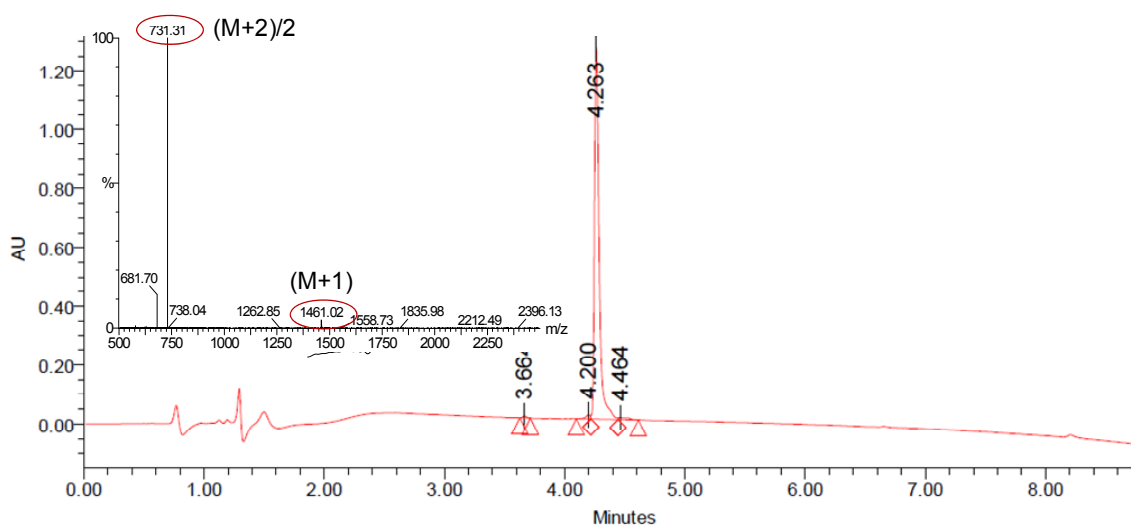

**Figure 8.** HPLC-MS profile of dendron **8** (G1-Ac-Bn). Analytical HPLC: 5→100% of CH<sub>3</sub>CN in H<sub>2</sub>O over 8 min,  $t_R$ =4.26 min (97% at  $\lambda$ =210 nm).



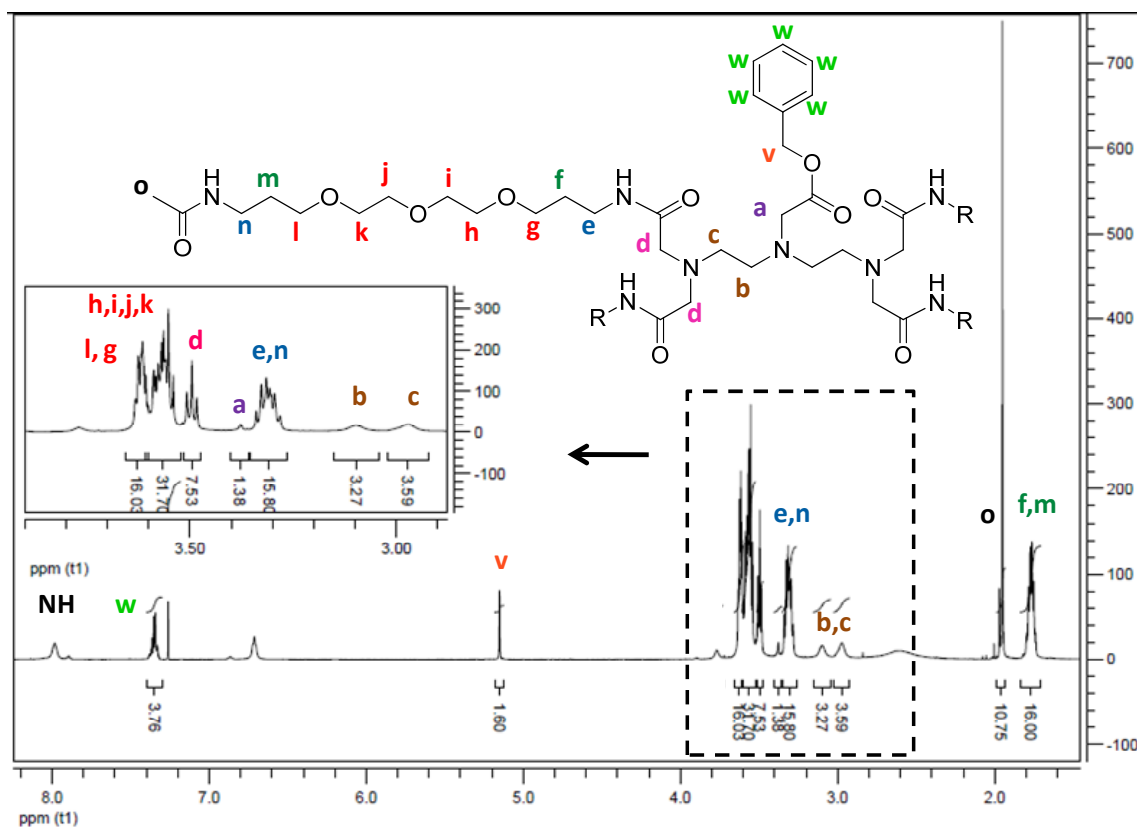

**Figure 9.**  $^1\text{H}$  NMR spectrometry of first generation dendron **8** (G1-Ac-Bn).

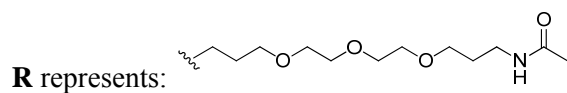

The signals assignment is equivalent for all branches.

$^1\text{H}$  NMR (500 MHz,  $\text{CDCl}_3$ , 25  $^\circ\text{C}$ ):  $\delta$ =1.77 (m, 16 H), 1.95 (s, 12 H), 2.97 (bs, 4 H), 3.10 (bs, 4 H), 3.31 (m, 16 H), 3.38 (s, 2 H), 3.50 (t,  $^3J(\text{H,H})$ =6.02 Hz, 8 H), 3.53-3.60 (m, 32 H), 3.60-3.65 (m, 16 H), 5.15 (s, 2 H), 7.34 (m, 5 H), and 7.98 (bs, NH).

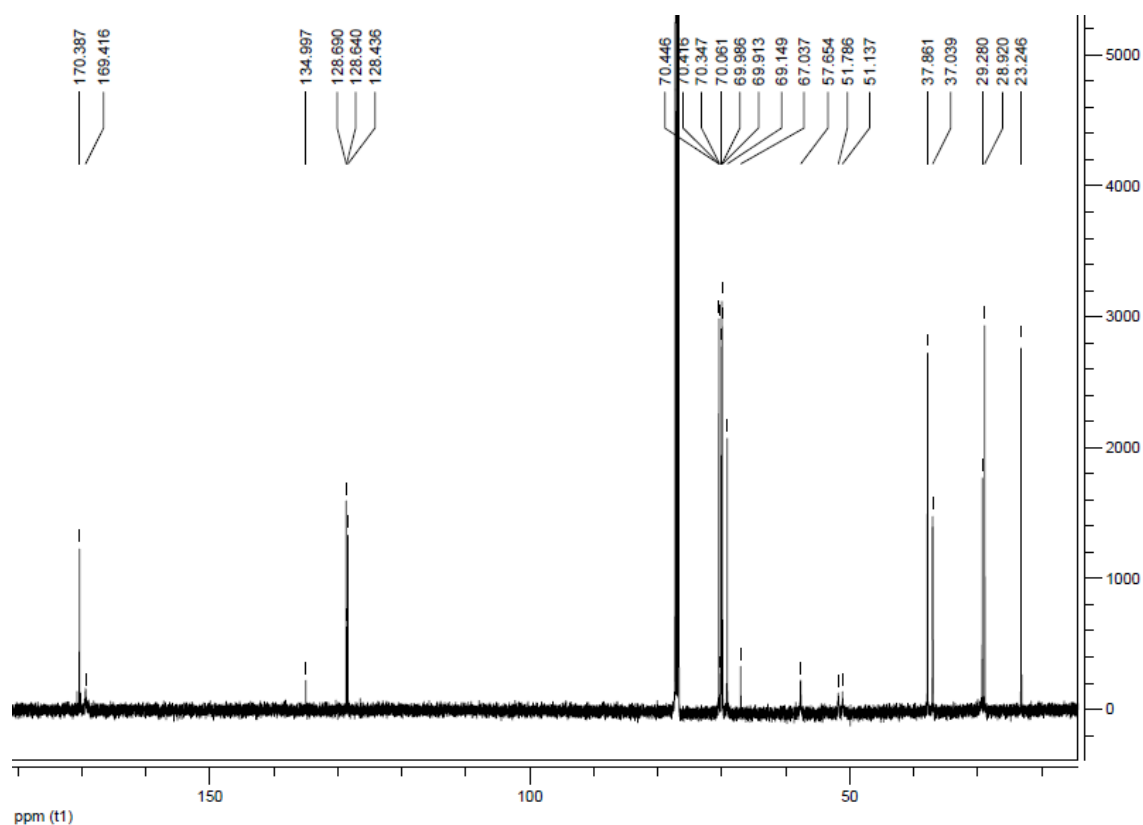

**Figure 10.**  $^{13}\text{C}$  NMR spectrometry of first generation dendron **8** (G1-Ac-Bn).

$^{13}\text{C}$  NMR (125 MHz,  $\text{CDCl}_3$ , 25 °C):  $\delta$ =23.25, 28.92, 29.30, 37.04, 37.90, 51.14, 51.79, 57.65, 67.04, 69.15, 69.91, 69.99, 70.06, 70.35, 70.42, 70.44, 128.44, 128.64, 128.69, 135.00, 169.42, and 170.39.

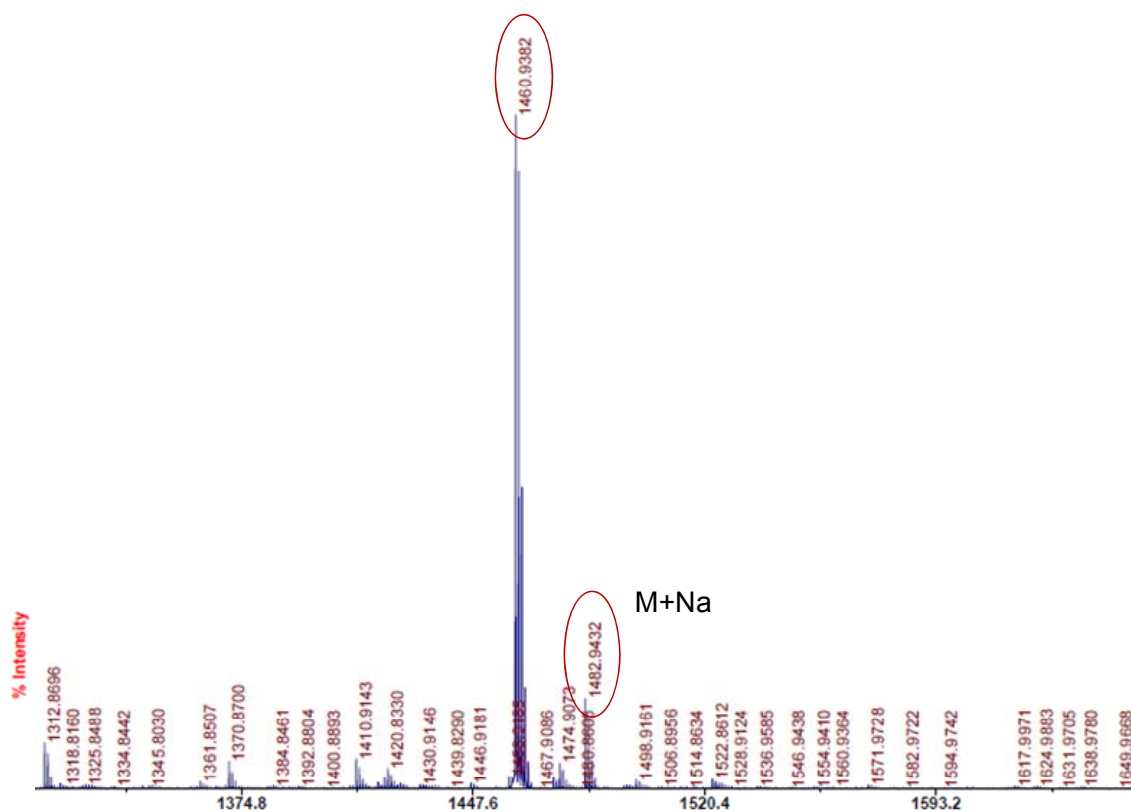

**Figure 11.** MALDI-TOF spectrometry of first generation dendron **8** (G1-Ac-Bn).

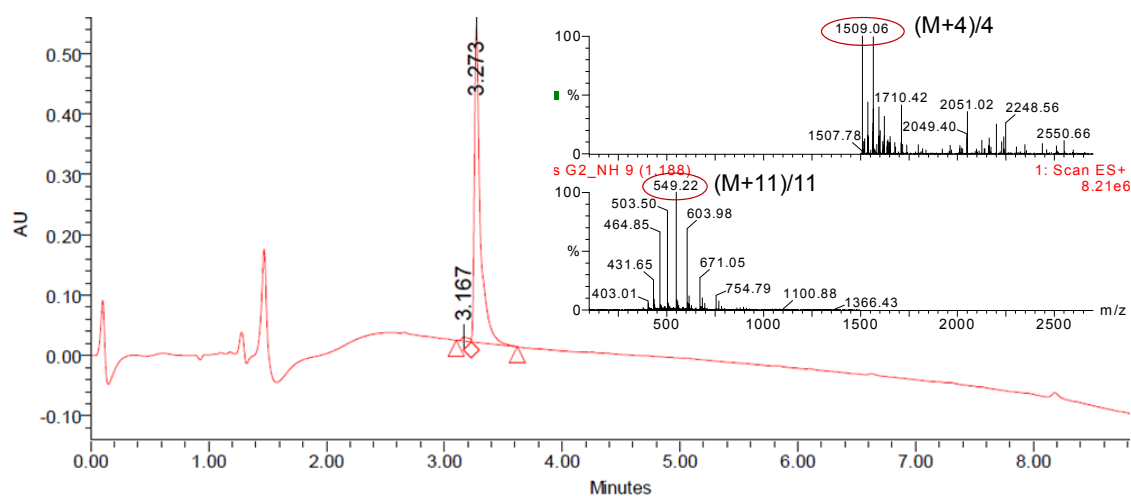

**Figure 12.** HPLC-MS profile of second generation dendron **13** (G2-NH<sub>2</sub>-Bn). Analytical HPLC: 5→100% of CH<sub>3</sub>CN in H<sub>2</sub>O over 8 min,  $t_R$ =3.27 min (98% at  $\lambda$ =210 nm).

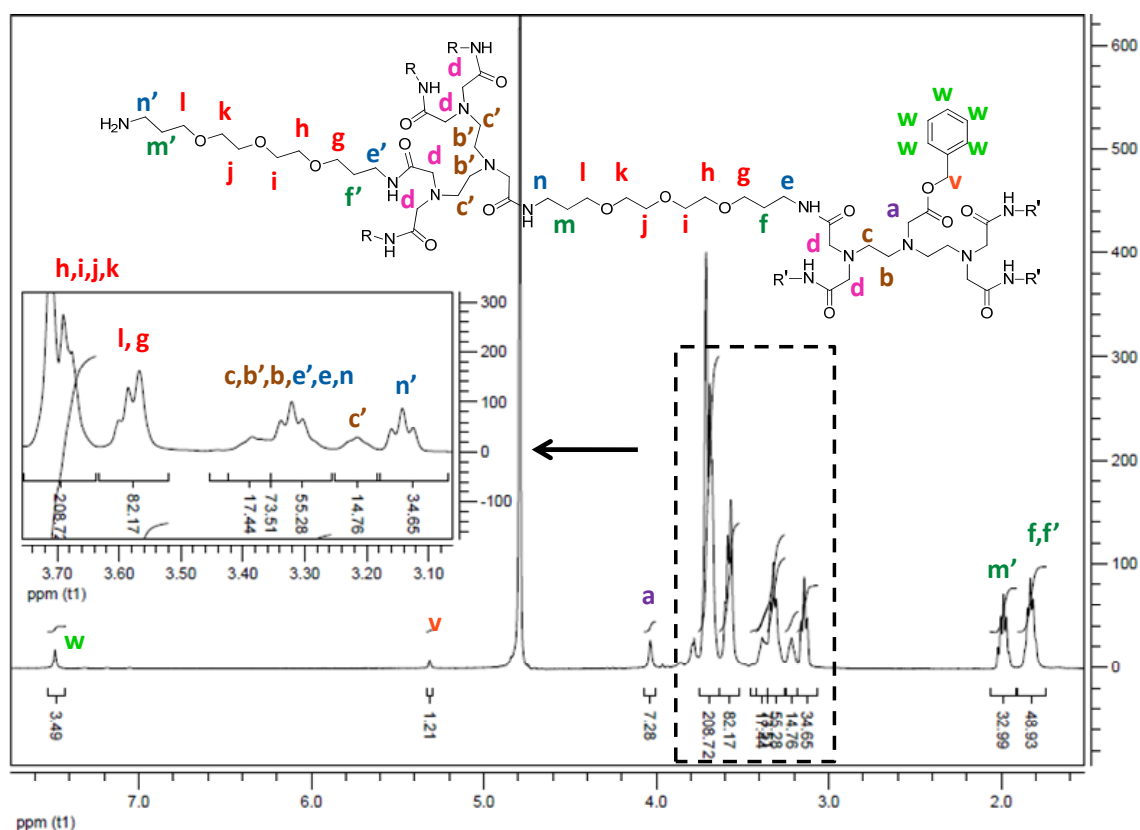

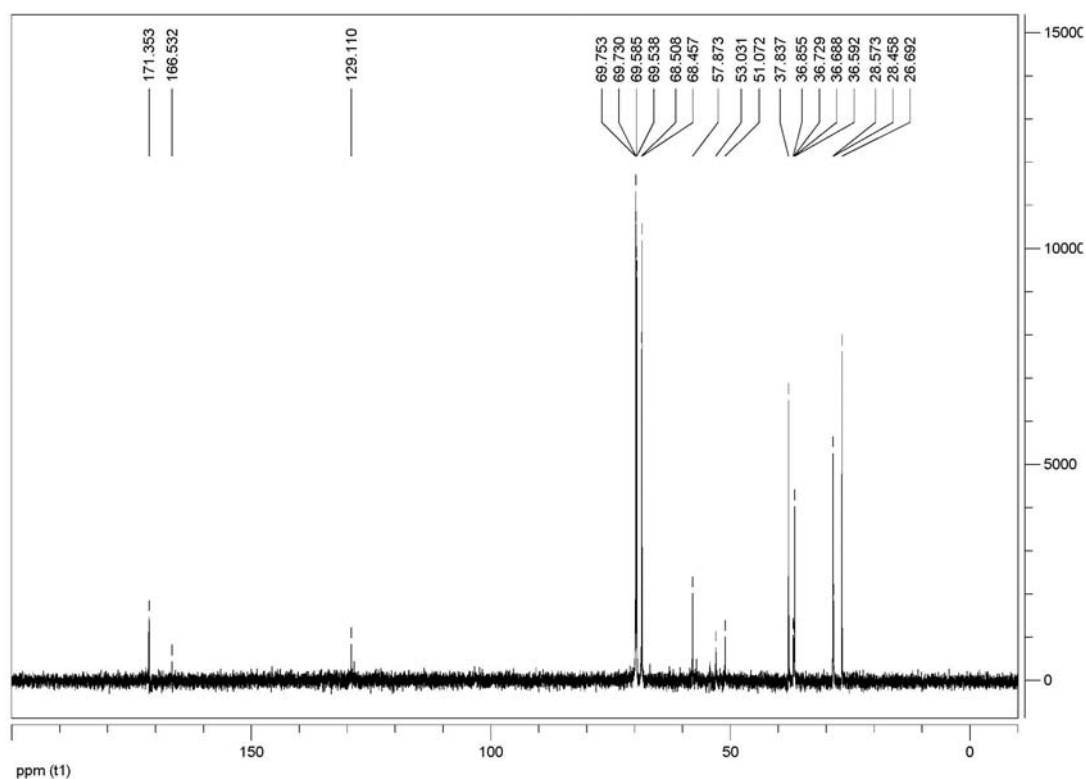

**Figure 14.**  $^{13}\text{C}$  NMR spectrometry of second generation dendron **13** ( $\text{G2-NH}_2\text{-Bn}$ ).

$^{13}\text{C}$  NMR (100 MHz,  $\text{D}_2\text{O}$ , 25 °C):  $\delta$ =26.69, 28.46, 28.57, 36.59, 36.86, 37.84, 51.07, 53.03, 57.87, 68.46, 68.51, 69.54, 69.59, 69.73, 69.75, 129.11, 166.53 and 171.35.

Applied Biosystems 4700 Proteomics Analyzer 2011

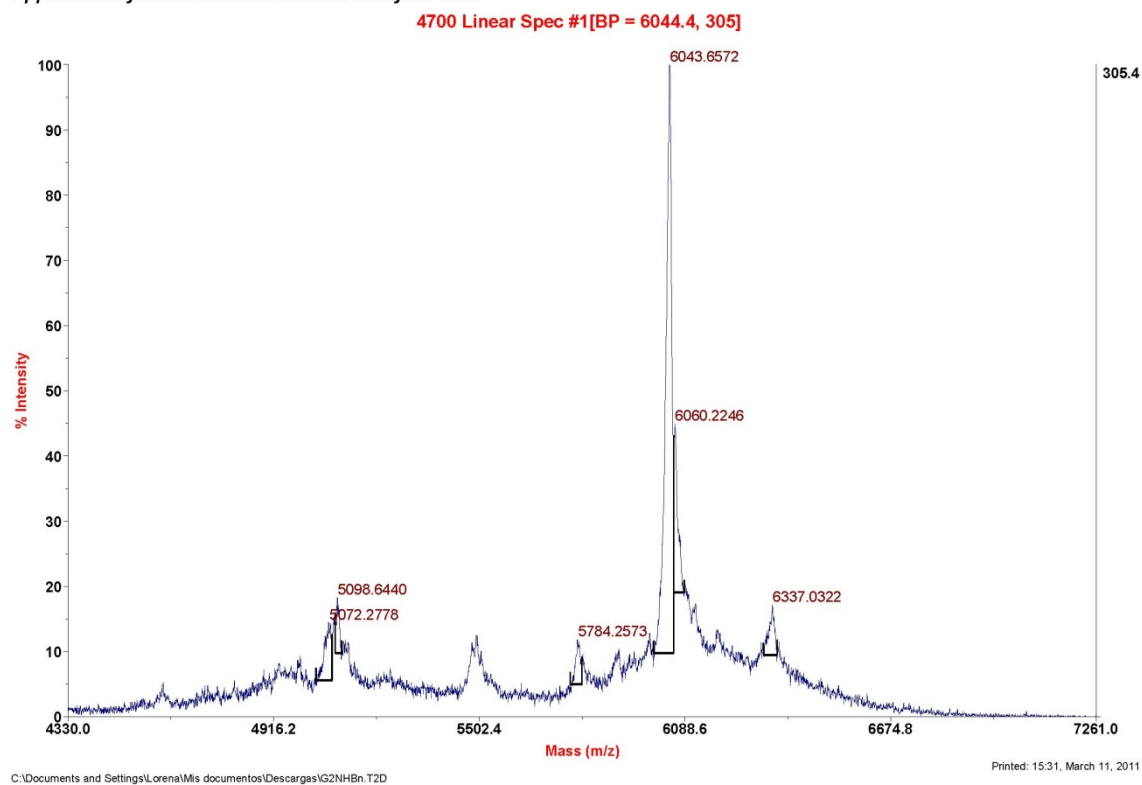

**Figure 15.** MALDI-TOF spectrometry of second generation dendron **13** ( $\text{G2-NH}_2\text{-Bn}$ ).

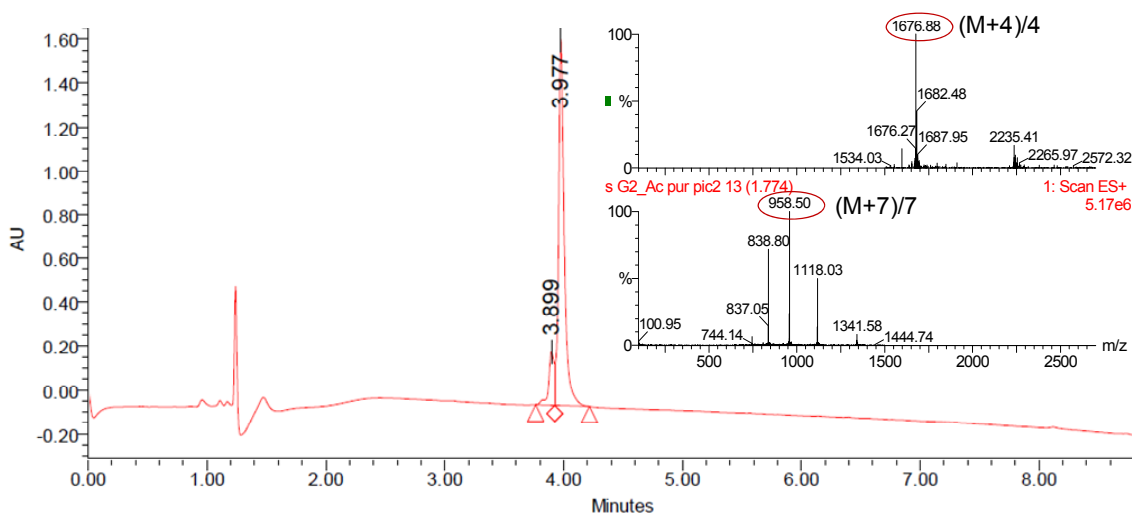

**Figure 16.** HPLC-MS profile of second generation dendron **14** (**G2-Ac-Bn**). Analytical HPLC: 5→100% of CH<sub>3</sub>CN in H<sub>2</sub>O over 8 min, *t<sub>R</sub>*=3.98 min (88% at λ=210 nm).

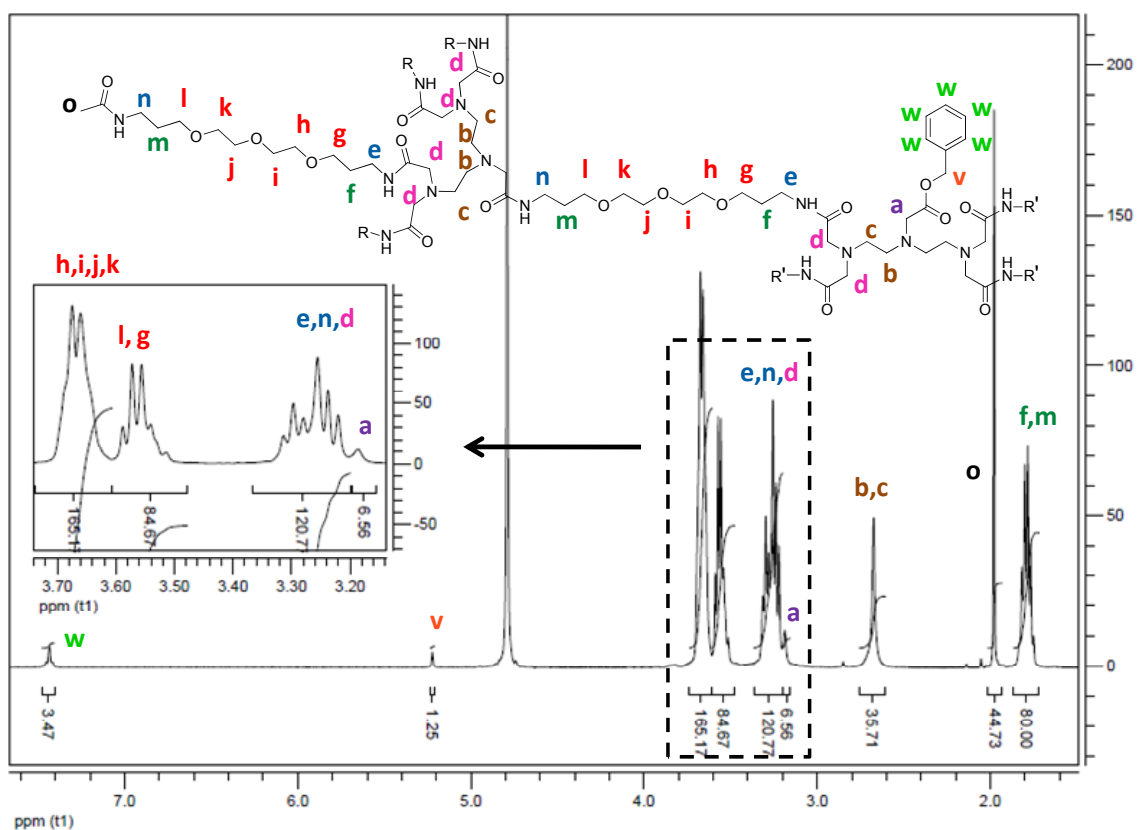

**Figure 17.** NMR spectrometry of second generation dendron **14** (G2-Ac-Bn).

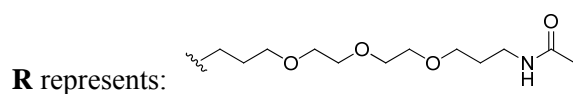

**R'** represents:

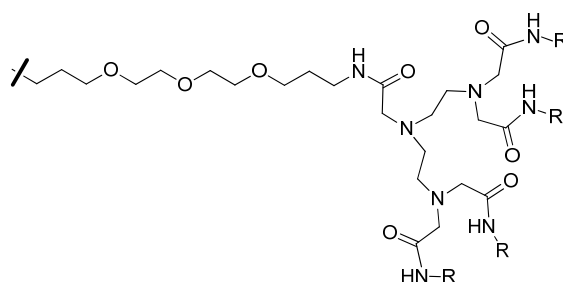

The signals assignment is equivalent for all branches.

**$^1\text{H}$  NMR** (400 MHz,  $\text{D}_2\text{O}$ , 25 °C):  $\delta$ =1.78 (m, 80 H), 1.98 (s, 48 H), 2.67 (s, 40 H), 3.19 (s, 2 H), 3.26 (m, 128 H), 3.56 (m, 80 H), 3.61-3.71 (m, 160 H), 5.22 (s, 2 H), and 7.43 (m, 5 H).

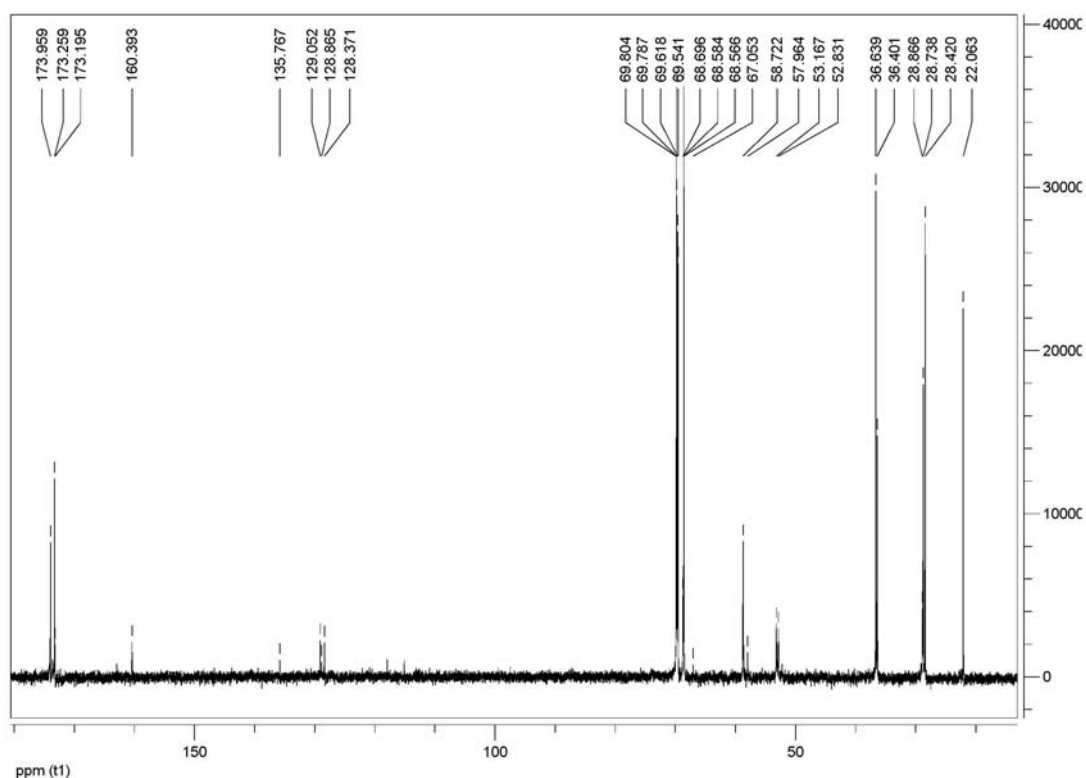

**Figure 18.**  $^{13}\text{C}$  NMR spectrometry of first generation dendron **14** (G2-Ac-Bn).

**$^{13}\text{C}$  NMR** (100 MHz,  $\text{D}_2\text{O}$ , 25 °C)  $\delta$ : 22.01, 28.42, 28.74, 28.87, 36.40, 36.64, 52.83, 53.17, 57.96, 58.72, 67.05, 68.57, 68.58, 68.70, 69.54, 69.62, 69.79, 69.80, 128.37, 128.87, 129.05, 135.77, 160.39, 173.20, 173.26, and 173.96.



Applied Biosystems 4700 Proteomics Analyzer 2011

4700 Linear Spec #1[BP = 6718.6, 1144]

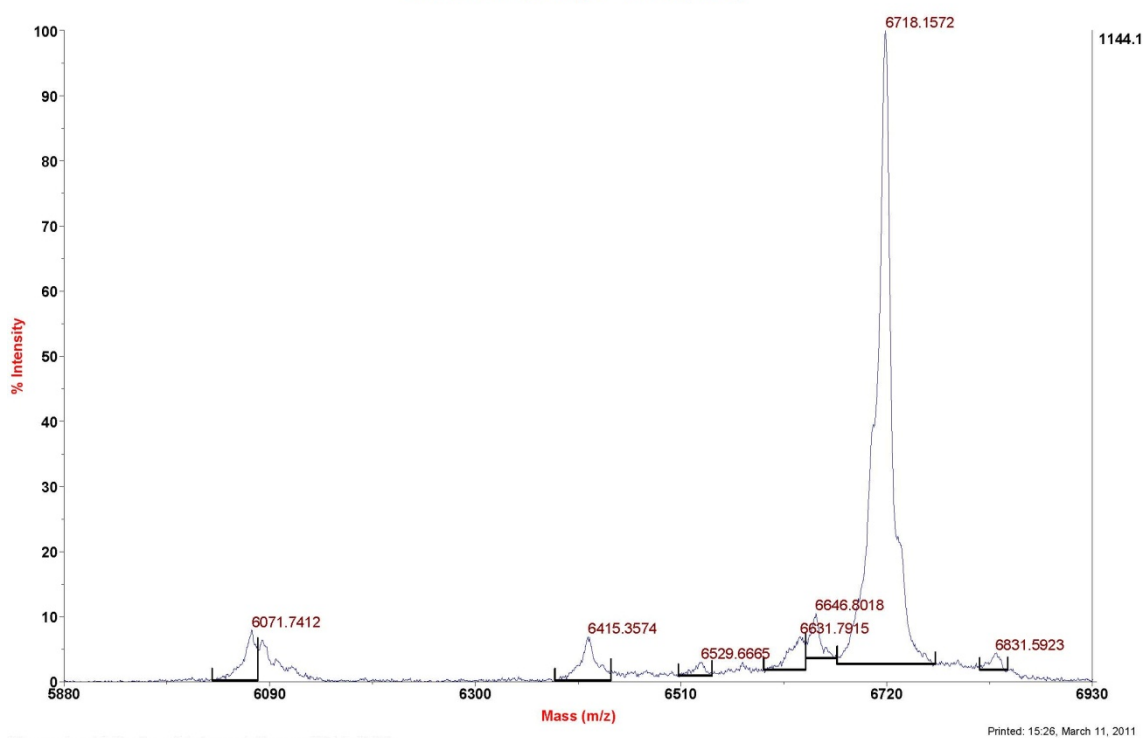

**Figure 19.** MALDI-TOF spectrometry of second generation dendron **14** (G2-Ac-Bn).
